# Supplementary material for: Sustainable waste-nitrogen upcycling enabled by low-concentration nitrate electrodialysis and high-performance ammonia electrosynthesis
Source: Royal Society of Chemistry journal article supplement (doi:10.1039/d3ey00058c), 2023-01-01
Supplement: d3ey00058c2.xlsx [file d3ey00058c2.xlsx]

## Sheet: OPEX-Electrodialysis
Name	Symbol	Value	Unit	Note	Source
Number of pairs	n	250
Effective membrane-pair area	A-pair	4480	cm2/pair
Total effective membrane-pair area	A-stack	112	m2/stack
Membrane width	W	134	cm
Membrane height/depth	H	33.5	cm
Membrane distance	d	0.05	cm
Nominal average velocity	V°	4	cm/s	Subjected to total cost minimization
Area spacer porosity	ɛ-a	60	%
Adjusted average velocity	V°'	6.66667	cm/s
AEM area resistance	R-AEM	2.5	Ωcm2
CEM area resistance	R-CEM	2.5	Ωcm2
Initial source concentration in ppm	Cs	100	ppm NO3-N	ppm NO3--N = mg NO3--N/L
Initial source concentration in mM	Cs	7.14286	mM	100 ppm-NO3--N/L = 7.14 mM
Recovery efficiency	RE	80	%
Final dilute concentration	Cd	1.42857	mM
Average source concentration	Cs°	4.28571	mM
Average source conductivity	σ-Cs°	0.484166	mS/cm	σ = σ0*C*(-0.0315*lgC^2-0.2336lgC+0.5529), σ0 = 121.55 mS/cm	CRC Handbook
Nominal average diluate resistance	R-Cs°	103.27	Ωcm2
Volume spacer porosity	ɛ-v	90	%
Adjusted average diluate resistance	R-Cs°'	114.745	Ωcm2	σ = σ0*C*(-0.0315*lgC^2-0.2336lgC+0.5529), σ0 = 121.55 mS/cm	CRC Handbook
Average concentrate concentration	Cc°	2000	mM	Choosing 2 M as target concentration in concentrate
Average concentrate conductivity	σ-Cc°	116.621	mS/cm
Nominal average concentrate resistance	R-Cc°	0.428739	Ωcm2
Adjusted average concentrate resistance	R-Cc°'	0.476376	Ωcm2
Area resistance per effective pair	R-pair	120.221	Ωcm2	R-pair = R-AEM + R-CEM + R-Cs°' + R-Cc°'
Resistance factor	fR	1.1		Assuming 10% additional resistance
Overall area resistance per effective pair	R-pair'	132.243	Ωcm2	R-pair' = R-pair*fR
Diffusion coefficient of NO3-	D-NO3-	1.76592e-05	cm2/s	D = D°*(-0.0315*lgC^2-0.2336lgC+0.5529), D°= 1.90 x 10^-5 cm2/s	CRC Handbook
Average limiting current density	iL°	2.07084	mA/cm2	iL° = 4.66*F*Cs°*(D^2/3)*(V°'/d*H)^1/3	Rosenberg and Tirrell method (1957)
Average current density	i	1.86376	mA/cm2	i = iL°*0.9	Environ. Sci. Water Res. Tech., 2019, 5, 1172
Total average stack-current	Is	8.34963	A
Donnan potential across membrane pair	φDon	0.314943	V	φDon = 2*0.059*lg(Cc°/Cs°)
Nominal electrodialysis voltage per pair	E-pair	0.561412	V	E-pair = iL*R-pair' + φDon	Membranes, 2021, 11, 217.
Nominal electrodialysis voltage per stack	E-stack	140.353	V	E-pair = i*R-pair'*n
Voltage efficiency	VE	80	%	Assuming 80% of voltage efficiency
Adjusted electrodialysis voltage per stack	E-stack'	175.441	V	E-stack' = E-stack/VE
Average electrodialysis power input per stack	P-stack	1464.87	W
Daily operation time	t	24	h
Coulombic efficiency	CE	90	%
Daily production rate of NO3- in mole	r-mol-d	1.6823	kmol-NO3-/day
Daily production rate of NO3- in mass	r-mass-d	104.303	kg-NO3-/day	2-5 M depending on requirement
Daily electrodialysis energy	Ee	35.1569	kWh/day
Energy intensity from electrodialysis		20.8981	kWh/kmol-NO3-
Electricity cost		0.07	$/kWh
Electrodialysis energy cost	OPEX-ed	1.46287	$/kmol-NO3-

## Sheet: OPEX-Pumping
Name	Symbol	Value	Unit	Note	Source
Number of pairs	n	250
Effective membrane-pair area	A-pair	4480	cm2/pair
Total effective membrane-pair area	A-stack	112	m2/stack
Membrane width	W	134	cm
Membrane height/depth	H	33.5	cm
Membrane distance	d	0.05	cm
Nominal average velocity	V°	4	cm/s		Membranes, 2021, 11, 217.
Area spacer porosity	ɛ-a	60	%
Adjusted average velocity	V°'	6.66667	cm/s
Adjusted channel diameter	dch	0.0230769	cm	dch = 4*ɛ/[(2/d)+(1-ɛ)*(8/d)]	Energy Procedia, 2012, 20, 170.
Re	Re	33.3333		Re = ρ*V°'*d/µ, Re <= 1,400, ρ = 1,000 kg/m3
Flow rate per pair	q	1.608	L/min
Flow rate per stack	Q	670	L/min
Pressure drop per pair	Δp-ch	20129.8	Pa	delta-P = 48*µ*V°'*H/(dch^2), µ = 0.001 Pa.s	J Membrane Sci, 2014, 462, 96.
Pressure drop factor	fp	0.5		fp = 0.5	J Membrane Sci, 2014, 462, 96.
Total pressure drop	Δp	40259.6	Pa	Δp = Δp-ch/fp
Hydraulic power	Ph	449.565	W	Ph = Δp*Q
Pumping efficiency	ηp	0.8	W	Assuming 80% of pumping efficiency
Pumping power	Pp	561.956	W	Pp = Ph/ηp
Initial source concentration	Cs	7.14286	mM	100 ppm-NO3--N/L = 7.14 mM
Recovery efficiency	RE	80	%	Assuming 80% of recovery efficiency
Final dilute concentration	Cd	1.42857	mM
Average source concentration	Cs°	4.28571	mM
Source volume per 1 kmol-NO3- recovery	Vs*	175	m3	per 1 kmol-NO3- recovery
Average current density	i	1.86376	mA/cm2
Total average stack-current	Is	8.34963	A
Daily operation time	t	24	h
Coulombic efficiency	CE	90	%
Daily production rate of NO3- in mole	r-mol-d	1.6823	kmol-NO3-/day
Daily production rate of NO3- in mass	r-mass-d	104.303	kg-NO3-/day	2-5 M depending on requirement
Total volume of source feed	Vs-d	294.403	m3/day
Daily pumping energy consumption	Ep	13.487	kWh
Pumping energy intensity		8.01697	kWh/kmol-NO3-
Electricity cost		0.07	$/kWh
Pumping energy cost	OPEX-p	0.561188	$/kmol-NO3-

## Sheet: CAPEX & LCC
Name	Symbol	Value	Unit	Note	Source
Cost of commercial electrodialysis system	Ccap-ED	35000	$/system	Hangzhou Iontech Environmental Technology Co., Ltd.	Alibaba.com
Number of pairs	n	250	pair
Dimension of membrane - width	W	40	cm
Dimension of membrane - height	H	160	cm
Gross membrane-pair area	A'-pair	6400	cm2/pair
Effective-to-gross area ratio	β	70	%
Effective membrane-pair area	A-pair	4480	cm2/pair
Total effective pair-area per stack	A-stack	112	m2/stack
Average current density	i	1.86376	mA/cm2
Total average stack-current	Is	8.34963	A
Coulombic efficiency	CE	90	%
Daily production rate of NO3-	r-mol-d	1.6823	kmol-NO3-/day
Capacity factor	CF	83.3	%	300 days a year
Annual production rate of NO3-	r-mol-a	511.495	kmol-NO3-/year	rmol-a = rmol-d*365*CF
Cost ratio of maintenance to system	γ	19	%	19%, based on the average of 27% and 11%	J. Environ. Qual., 2017, 46, 1528.
Cost of total maintenance	Cmain-ED	6650	$	replacement/repair of some membranes & parts	J. Environ. Qual., 2017, 46, 1528.
Total present value of cost (TPVC)	TPVC	41650	$	TPVC = Ccap-ED + Cmain-ED	Water Resour. Econ., 2013, 2-3, 30.
Time of service	t	40	year
Annual discount rate	α	3	%	3% for real and 2.5% for nominal	2013 publication: NISTIR - 85-3273-28
Capital recovery factor (CRF)	CRF	0.0432624		CRF = m*(1 + α)^m/((1 + α)^m - 1)
Equal annual cost (EAC)	ECA	1801.88	$	ECA = TPVC*CRF	Water Resour. Econ., 2013, 2-3, 30.
Levelized capital cost (LCC)	LCC	3.52277	$/kmol-NO3-	LCC = ECA/rmol-a

## Sheet: Levelized Total Cost
Name	Symbol	Value	Unit	Note	Source
OPEX-electrodialysis	OPEX-ed	1.46287	$/kmol-NO3-
OPEX-pumping	OPEX-p	0.561188	$/kmol-NO3-
OPEX-others	OPEX-o	0.202405	$/kmol-NO3-	Assuming 10% of the sum of OPEX-pumping and OPEX-electrodialysis
Operational Expense (OPEX)	OPEX	2.22646	$/kmol-NO3-	OPEX = OPEX-p + OPEX-e + OPEX-o
Levelized Capital Cost (LCC)	LCC	3.52277	$/kmol-NO3-	Containing maintenance expense (a form of OPEX)
Levelized Total Cost (LTC)	LTC	5.74923	$/kmol-NO3-	LTC=LCC+OPEX
