# Supplementary material for: Sustainable waste-nitrogen upcycling enabled by low-concentration nitrate electrodialysis and high-performance ammonia electrosynthesis
Source: Royal Society of Chemistry journal article supplement (doi:10.1039/d3ey00058c), 2023-01-01
Supplement: d3ey00058c3.xlsx [file d3ey00058c3.xlsx]

## Sheet: OPEX
Name	Symbol	Value	Unit	Note	Source
Electrode area per fin	A-fin	2800	cm2/fin	40 cm x 35 cm x 2
Number of electrode fins	n	12	fin/cell
Total area of electrode	A-cell	33600	cm2/cell
Current density	i	250	mA/cm2
Total current	I-cell	8400	A/cell
Number of cells per pack	m	1
Operation temperature	T	120	oC
Cell voltage	E	2.7	V
Power of electrolysis	P-electrolysis	22.68	kW
Daily operation time	t	24	h
Coulombic efficiency	CE	90	%
Daily production rate of HN3 in mole	r-mol-d	0.846225	kmol-NH3/day
Daily production rate of NH3 in mass	r-mass-d	14.3858	kg-NH3/day
Daily electrolysis energy	Ee	544.32	kWh/day
Energy intensity from electrolysis		643.233	kWh/kmol-NH3
Electricity cost		0.07	$/kWh
OPEX-electrolysis	OPEX-el	45.0263	$/kmol-NH3
Density	ρ	1.51461	g/cm3	ρ = 1.61061 - 0.0008*T	See *
Viscosity	µ	1.85063	mPa.s	µ = 2341.3*(T*^(-1.492))	See *
Diameter of impeller	di	15	cm
Rotation frequency	rps	5	round/s
Reynolds # (Re)	Re	92073.5		Re = di^2*rps*d/µ, Re < 10
Froude # (Fr)	Fr	0.382263		Fr = ρ*rps^2/g, g = 9.81 m/s2
Power #, P0	P0	6		P0 = 6, when Re > 6,000	Food Process Engineering and Technology, 2009
Power of stirring	P-stirring	0.0862618	kW	P = P0*di^5*rps^3*ρ
Daily stirring energy	Es	2.07028	kWh
Energy intensity from stirring		2.44649	kWh/kmol-NH3
OPEX-mixing	OPEX-s	0.171254	$/kmol-NH3
Power of heating	P-heating	1.134	kW	5% of electrolysis power
Daily stirring energy	Es	27.216	kWh
Energy intensity from heating		32.1617	kWh/kmol-NH3
OPEX-heating	OPEX-h	2.25132	$/kmol-NH3
Operational Expenses (OPEX)	OPEX	47.4489	$/kmol-NH3
* Proceedings of International conference: CFCs; F. COTANA, ASDRUBALI F, & SANTARPIA L (1994). Thermophysical properties of H2O-NaOH-KOH mixtures: experimental data.

## Sheet: CAPEX & LCC
Name	Symbol	Value	Unit	Note	Source
Power rating per cell	Pcell	22.7663	kW
Total area of electrode	A-cell	3.36	m2/cell
Price of cathode material		29.97	$/m2	Nickel cloth with 200 mesh count, current price	www.made-in-china.com
Cost of cathode materials	C-cm	100.699	$/cell
Price of anode material		29.97	$/m2	Nickel cloth with 200 mesh count, current price	www.made-in-china.com
Cost of anode materials	C-am	100.699	$/cell
Volume of NaOH-KOH-H2O electrolyte	Ve	100	L	50 cm x 50 cm x 40 cm
Density of NaOH-KOH-H2O electrolyte	ρ	1.51461	g/cm3
Weight of NaOH		37.8653	kg/cell	25wt.% in NaOH, based on 40wt.% in H2O
Price of NaOH		282	$/ton-NaOH	Five-year average 2016-2020	tradingeconomics.com
Cost of NaOH		10.678	$/cell
Weight of KOH		53.0114	kg/cell	35wt.% in NaOH, based on 40wt.% in H2O
Price of KOH		235.6	$/ton-KOH	Five-year average 2016-2020	www.statista.com
Cost of KOH		12.4895	$/cell
Cost of NaOH-KOH-H2O electrolyte	C-electrolyte	23.1675	$/cell
Volume of PTFE		0.0125	m3/cell	50 cm x 50 cm x 40 cm @ 1 cm
Weight of PTFE		27.5	kg/cell	Based on 2.2 g/cm3 of PTFE density
Price of cell body - PTFE		13000	$/ton	2017 price	www.statista.com
Cost of cell body - PTFE	C-body	357.5	$/cell
Volume of stainless steel		0.0125	m3/cell	50 cm x 50 cm x 40 cm @ 1 cm
Weight of stainless steel		97.5	kg/cell	Based on 7.8 g/cm3 of stainless steel density
Price of cell body - stainless steel		535.6	$/ton	Five-year average 2015-2019	www.focus-economics.com
Cost of cell body - stainless steel	C-liner	52.221	$/cell
Power of stirring	P	86.2618	W
Cost of stirring motor and parts	C-stirrer	47.5	$/cell	100-W motor, and corrosion-resistant rod/blades	picclick.com
Cost of coolant gaskets	C-gasket	37	$/cell		Strategic Analysis Report: $37/stack
Cost of cell assembly	C-assembly	33	$/cell		Strategic Analysis Report: $33/stack
Cost of temperature conditioning	C-conditioning	42	$/cell		Strategic Analysis Report: $42/stack
Cost of current collectors	C-collector	4	$/cell		Strategic Analysis Report: $4/stack
Cost of Balance-Of-Plant (BOP)	C-BOP	29.4	$/cell		Strategic Analysis Report: $29.44/stack
Cost of Combined Heat and Power (CHP)	C-CHP	10.61	$/cell		Strategic Analysis Report: $10.61/stack
Cost of Power Electronics (PE)	C-PE	325.9	$/cell		Strategic Analysis Report: $325.90/stack
Cost of all identified materials and parts	C-m&p	1163.7	$/cell		Strategic Analysis Report
Cost of all other parts and minor materials	C-others	116.37	$/cell	10% of all identified materials and parts
Cost Contingency	C-CC	128.007	$/cell	10% of the cost of all materials and parts	Strategic Analysis Report
Sales Markup (SM)	C-SM	816.682	$/cell	50% of the cost of all materials and parts & sales markup	Strategic Analysis Report
Cost of System Installation	C-SI	896.047	$/cell	70% of the cost of all materials and parts	Strategic Analysis Report
Capital Expenses, CAPEX	CAPEX	3120.8	$/cell
Average current density	i	250	mA/cm2
Total average stack-current	Is	8400	A
Coulombic efficiency	CE	90	%
Daily production rate of NH3	r-mol-d	0.846225	kmol-NH3/day
Capacity factor	CF	83.33	%	300 days a year
Annual production rate of NH3	r-mol-a	257.383	kmol-NH3/year	rmol-a = rmol-d*365*CF
Cost ratio of maintenance to system	γ	19	%	Assuming 19% fo total capital cost
Cost of total maintenance	Cmain-El	592.952	$	Replacement/repair of some electrodes & parts	J. Environ. Qual., 2017, 46, 1528.
Total present value of cost (TPVC)	TPVC	3713.75	$	TPVC = Ccap-ED + Cmain-ED	Water Resour. Econ., 2013, 2-3, 30.
Time of service	t	20	year
Annual discount rate	α	3	%	3% for real and 2.5% for nominal	2013 publication: NISTIR - 85-3273-28
Capital recovery factor (CRF)	CRF	0.0672157		CRF = m*(1 + α)^m/((1 + α)^m - 1)
Equal annual cost (EAC)	ECA	249.623	$	ECA = TPVC*CRF	Water Resour. Econ., 2013, 2-3, 30.
Levelized Capital Cost (LCC)	LCC	0.969849	$/kmol-NH3	LCC = ECA/rmol-a

## Sheet: Levelized Total Cost
Name	Symbol	Value	Unit	Note	Source
OPEX-electrolysis	OPEX-el	45.0263	$/kmol-NH3
OPEX-mixing	OPEX-m	0.171254	$/kmol-NH3
OPEX-heating	OPEX-h	2.25132	$/kmol-NH3
Operational Expenses (OPEX)	OPEX	47.4489	$/kmol-NH3	OPEX = OPEX-el + OPEX-m + OPEX-h
Levelized Capital Cost (LCC)	LCC	0.969849	$/kmol-NH3	Containing maintenance expense (a form of OPEX)
Levelized Total Cost (LTC)	LTC	48.4188	$/kmol-NH3	LTC = LCC + OPEX
